# Supplementary material for: Patients with Obesity and a History of Metformin Treatment Have Lower Influenza Mortality: A Retrospective Cohort Study
Source: MDPI journal article supplement (doi:10.3390/pathogens11020270), 2022-02-19
Supplement: s1 [file s1]

**Table S1. Baseline Demographic and Comorbid Characteristics for Matched Cohort.**

| Variable                                        |               | Diabetes              |                               | Non-Diabetes<br>N=456 | <i>p</i> -value | Standardized<br>Difference |
|-------------------------------------------------|---------------|-----------------------|-------------------------------|-----------------------|-----------------|----------------------------|
|                                                 |               | No Metformin<br>N=456 | Metformin<br>exposed<br>N=456 |                       |                 |                            |
| Sex                                             | Female        | 25(5.48)              | 36(7.89)                      | 33(7.24)              | 0.330           | 0.097                      |
|                                                 | Male          | 431(94.52)            | 420(92.11)                    | 423(92.76)            |                 | 0.097                      |
| Race                                            | Black         | 92(20.18)             | 89(19.52)                     | 86(18.86)             | 0.971           | 0.033                      |
|                                                 | Other/Unknown | 28(6.14)              | 26(5.7)                       | 30(6.58)              |                 | 0.037                      |
|                                                 | White         | 336(73.68)            | 341(74.78)                    | 340(74.56)            |                 | 0.023                      |
| Age (mean, standard deviation)                  |               | 67.94(10.48)          | 65.96(11.25)                  | 66.86(13.13)          | 0.037           | 0.182                      |
| Charlson comorbidity (mean, standard deviation) |               | 2.95(2.49)            | 2.74(2.15)                    | 2.19(2.22)            | <0.001          | 0.324                      |
| Pure Hypercholesterolemia                       |               | 11(2.41)              | 14(3.07)                      | 20(4.39)              | 0.235           | 0.109                      |
| Hyperlipidemia                                  |               | 271(59.43)            | 249(54.61)                    | 260(57.02)            | 0.339           | 0.097                      |
| Hypertriglyceridemia                            |               | 64(14.04)             | 71(15.57)                     | 80(17.54)             | 0.345           | 0.096                      |
| Hypertension                                    |               | 357(78.29)            | 356(78.07)                    | 377(82.68)            | 0.150           | 0.116                      |
| Smoking                                         |               | 75(16.45)             | 68(14.91)                     | 62(13.6)              | 0.483           | 0.080                      |
| Ischemic Heart Disease                          |               | 132(28.95)            | 133(29.17)                    | 124(27.19)            | 0.769           | 0.044                      |
| Non-ischemic Heart Disease                      |               | 109(23.9)             | 109(23.9)                     | 109(23.9)             | 1.000           | 0.000                      |
| Metformin MPR*100 (mean, standard deviation)    |               | --(--)                | 0.75(0.27)                    | --(--)                | --(--)          | --(--)                     |
| HbA1c (mean, standard deviation)                |               | 6.36(1.18)            | 7.63(1.6)                     | --(--)                | <0.001          | 0.900                      |
| Index year (mean, standard deviation)           |               | 2017.29(1.62)         | 2017.35(1.73)                 | 2017.12(1.72)         | 0.095           | 0.135                      |

\* *p*-value is from Chi-Square test or ANOVA comparing across cohorts.

**Table S2. Mortality rate among matched cohorts.**

|                               | Diabetics with no<br>metformin (N=456) | Diabetics with<br>metformin (N=456) | No diabetes (N=456) | <i>p</i> -value | Standardized<br>Difference |
|-------------------------------|----------------------------------------|-------------------------------------|---------------------|-----------------|----------------------------|
| <i>Number of patients (%)</i> | 74(16.23)                              | 36(7.89)                            | 57(12.5)            | <0.001          | 0.258                      |

**Table S3. Cox Proportional Hazards Model for Death in Matched Cohort.**

| Variables                                | Death               |
|------------------------------------------|---------------------|
|                                          | HR (95% CI)         |
| Diabetic status (reference=Non-Diabetic) |                     |
| Diabetic no metformin                    | 1.154 (0.805-1.654) |
| Diabetic with metformin                  | 0.590 (0.384-0.905) |
| Sex (ref=Female)                         |                     |
| Male                                     | 1.188 (0.517-2.730) |
| Age                                      | 1.049 (1.034-1.064) |
| Race (reference=White)                   |                     |
| Black                                    | 1.070 (0.718-1.595) |
| Other/Unknown                            | 0.959 (0.443-2.076) |
| Charlson comorbidity                     | 1.265 (1.198-1.336) |
| Pure Hypercholesterolemia                | 0.633 (0.257-1.559) |
| Hyperlipidemia                           | 0.789 (0.571-1.091) |
| Hypertriglyceridemia                     | 0.967 (0.624-1.498) |
| Hypertension                             | 0.925 (0.588-1.454) |
| Smoking                                  | 1.333 (0.916-1.942) |
| Ischemic Heart Disease                   | 0.963 (0.676-1.372) |
| Non-ischemic Heart Disease               | 1.510 (1.069-2.133) |
| Index year                               | 0.873 (0.799-0.954) |

**Table S4. Mortality rate at 30- and 60-days post influenza diagnosis among the original cohort.**

|                    | Diabetics with no<br>metformin (N=493) | Diabetics with<br>metformin (N=1597) | No diabetes (N=1461) | <i>p</i> -value | Standardized<br>Difference |
|--------------------|----------------------------------------|--------------------------------------|----------------------|-----------------|----------------------------|
| 30-day Mortality   |                                        |                                      |                      |                 |                            |
| Number of patients | 7(1.42)                                | 7(0.44)                              | 5(0.34)              | 0.0139          | 0.115                      |
| (%)                |                                        |                                      |                      |                 |                            |
| 60-day Mortality   |                                        |                                      |                      |                 |                            |
| Number of patients | 10(2.03)                               | 17(1.06)                             | 7(0.48)              | 0.0079          | 0.139                      |
| (%)                |                                        |                                      |                      |                 |                            |

**Table S5. Cox Proportional Hazards Model for 30-day and 60-day Mortality among the original cohort.**

| Variables                                | 30-day Death<br>HR (95% CI) | 60-day Death<br>HR (95% CI) |
|------------------------------------------|-----------------------------|-----------------------------|
| Diabetic status (reference=Non-Diabetic) |                             |                             |
| Diabetic no metformin                    | 2.407 (0.705-8.217)         | 1.812 (0.640-5.130)         |
| Diabetic with metformin                  | 0.935 (0.274-3.191)         | 1.286 (0.502-3.292)         |
| Sex (ref=Female)                         |                             |                             |
| Male                                     | na (na-na)*                 | na (na-na)*                 |
| Age                                      | 1.057 (1.014-1.102)         | 1.051 (1.019-1.084)         |
| Race (reference=White)                   |                             |                             |
| Black                                    | 0.280 (0.037-2.141)         | 0.527 (0.158-1.763)         |
| Other/Unknown                            | 1.035 (0.134-8.001)         | 0.679 (0.091-5.078)         |
| Charlson comorbidity                     | 1.129 (0.958-1.329)         | 1.244 (1.119-1.383)         |
| Pure Hypercholesterolemia                | na (na-na)*                 | na (na-na)*                 |
| Hyperlipidemia                           | 0.649 (0.246-1.712)         | 0.625 (0.298-1.312)         |
| Hypertriglyceridemia                     | 0.979 (0.280-3.425)         | 0.622 (0.217-1.788)         |
| Hypertension                             | 0.863 (0.266-2.806)         | 0.479 (0.206-1.111)         |
| Smoking                                  | 1.649 (0.568-4.785)         | 1.235 (0.504-2.824)         |
| Ischemic Heart Disease                   | 0.389 (0.128-1.179)         | 0.532 (0.248-1.143)         |
| Non-ischemic Heart Disease               | 2.077 (0.712-6.058)         | 2.859 (1.262-6.480)         |
| Index year                               | 0.821 (0.643-1.049)         | 0.905 (0.740-1.106)         |

\* Hazard ratio and confidence interval is not estimated due to sample size and few patients within categories in outcome of interest

**Table S6. Diagnosis and LOINC Test Codes associated with confirmed laboratory influenza.**

|             |                                                                                                                                                                                                                                                                                                       |
|-------------|-------------------------------------------------------------------------------------------------------------------------------------------------------------------------------------------------------------------------------------------------------------------------------------------------------|
| ICD9 Codes  | 078.2, 465.8, 465.9, 487.0, 487.1, 487.8, 488.01, 488.02, 488.09, 488.1, 488.11, 488.12, 488.19, 488.81, 488.82, 488.89, 780.60, 780.61, 780.64, 786.2, V04.81, V06.6                                                                                                                                 |
| ICD10 Codes | A01.00, A37.00, A68.9, A78., A94., A98.8, G44.83, J06.9, J09.X1, J09.X2, J09.X3, J09.X9, J10.00, J10.01, J10.08, J10.1, J10.2, J10.81, J10.82, J10.83, J10.89, J11.00, J11.08, J11.1, J11.2, J11.81, J11.82, J11.83, J11.89, J12.2, J20.4, J45.991, R05., R06.6, R50.2, R50.81, R50.82, R50.9, R68.83 |
| LOINC       | 34487-9, 38272-1, 40982-1, 48509-4, 49521-8, 49524-2, 49531-7, 53250-7, 53251-5, 55465-9, 60494-2, 62462-7, 76078-5, 76080-1, 77026-3, 77027-1, 77028-9, 82166-0, 82167-8, 82168-6, 82169-4, 82170-2                                                                                                  |

**Table S7. Baseline Demographic and Comorbid Characteristics for Cohort without Positive COVID test.**

| Variable                                        |               | Diabetes              |                                | Non-Diabetes<br>N=1424 | p-value | Standardized<br>Difference |
|-------------------------------------------------|---------------|-----------------------|--------------------------------|------------------------|---------|----------------------------|
|                                                 |               | No Metformin<br>N=474 | Metformin<br>exposed<br>N=1547 |                        |         |                            |
| Sex                                             | Female        | 26(5.49)              | 100(6.46)                      | 169(11.87)             | <0.001  | 0.228                      |
|                                                 | Male          | 448(94.51)            | 1447(93.54)                    | 1255(88.13)            |         | 0.228                      |
| Race                                            | Black         | 92(19.41)             | 296(19.13)                     | 236(16.57)             | 0.382   | 0.074                      |
|                                                 | Other/Unknown | 26(5.49)              | 79(5.11)                       | 81(5.69)               |         | 0.026                      |
|                                                 | White         | 356(75.11)            | 1172(75.76)                    | 1107(77.74)            |         | 0.062                      |
| Age (mean, standard deviation)                  |               | 69.08(11.05)          | 66.67(10.33)                   | 60.63(15.35)           | <0.001  | 0.632                      |
| Charlson comorbidity (mean, standard deviation) |               | 3.26(2.76)            | 3.64(2.53)                     | 1.16(1.74)             | <0.001  | 1.141                      |
| Pure Hypercholesterolemia                       |               | 9(1.9)                | 53(3.43)                       | 37(2.6)                | 0.158   | 0.095                      |
| Hyperlipidemia                                  |               | 292(61.6)             | 952(61.54)                     | 606(42.56)             | <0.001  | 0.388                      |
| Hypertriglyceridemia                            |               | 61(12.87)             | 312(20.17)                     | 181(12.71)             | <0.001  | 0.202                      |
| Hypertension                                    |               | 371(78.27)            | 1341(86.68)                    | 848(59.55)             | <0.001  | 0.643                      |
| Smoking                                         |               | 85(17.93)             | 234(15.13)                     | 214(15.03)             | 0.279   | 0.078                      |
| Ischemic Heart Disease                          |               | 150(31.65)            | 500(32.32)                     | 252(17.7)              | <0.001  | 0.343                      |
| Non-ischemic Heart Disease                      |               | 138(29.11)            | 368(23.79)                     | 178(12.5)              | <0.001  | 0.418                      |
| Metformin MPR*100 (mean, standard deviation)    |               | --(--)                | 0.73(0.28)                     | --(--)                 | --(--)  | --(--)                     |
| HbA1c (mean, standard deviation)                |               | 6.37(1.17)            | 7.66(1.63)                     | --(--)                 | <0.001  | 0.906                      |
| Index year (mean, standard deviation)           |               | 2017.29(1.65)         | 2017.37(1.6)                   | 2017.36(1.61)          | 0.605   | 0.052                      |

**Table S8. Mortality rate among matched cohort without Positive COVID test.**

|                                   | Diabetics with no<br>metformin (N=474) | Diabetics with<br>metformin (N=1547) | No diabetes<br>(N=1424) | p-value | Standardized<br>Difference |
|-----------------------------------|----------------------------------------|--------------------------------------|-------------------------|---------|----------------------------|
| <i>Number of patients<br/>(%)</i> | 92(19.41)                              | 197(12.73)                           | 118(8.29)               | <0.001  | 0.326                      |

**Table S9. Cox Proportional Hazards Model for Death in Cohort without Positive COVID test.**

| <b>Variables</b>                         | <b>Death<br/>HR (95% CI)</b> |
|------------------------------------------|------------------------------|
| Diabetic status (reference=Non-Diabetic) |                              |
| Diabetic no metformin                    | 1.053 (0.786-1.411)          |
| Diabetic with metformin                  | 0.778 (0.608-0.996)          |
| Sex (ref=Female)                         |                              |
| Male                                     | 1.231 (0.740-2.048)          |
| Age                                      | 1.048 (1.039-1.058)          |
| Race (reference=White)                   |                              |
| Black                                    | 0.831 (0.628-1.100)          |
| Other/Unknown                            | 0.679 (0.380-1.211)          |
| Charlson comorbidity                     | 1.265 (1.222-1.309)          |
| Pure Hypercholesterolemia                | 0.800 (0.448-1.428)          |
| Hyperlipidemia                           | 0.762 (0.617-0.942)          |
| Hypertriglyceridemia                     | 0.847 (0.642-1.117)          |
| Hypertension                             | 1.058 (0.792-1.413)          |
| Smoking                                  | 1.403 (1.113-1.770)          |
| Ischemic Heart Disease                   | 0.986 (0.789-1.232)          |
| Non-ischemic Heart Disease               | 1.404 (1.117-1.766)          |
| Index year                               | 0.898 (0.847-0.951)          |
